# Supplementary material for: Thermoreversible crystallization-driven aggregation of diblock copolymer nanoparticles in mineral oil
Source: PubMed Central journal article supplement (PMC5944243; doi:10.1039/c8sc00762d), 2018-04-02
Supplement: SC-009-C8SC00762D-s001.pdf [file SC-009-C8SC00762D-s001.pdf]

Supporting Information for:

Thermoreversible crystallization-driven aggregation of diblock copolymer nanoparticles in mineral oil

Matthew J. Derry,<sup>\*</sup> Oleksandr O. Mykhaylyk, Anthony J. Ryan and Steven P. Armes<sup>\*</sup>

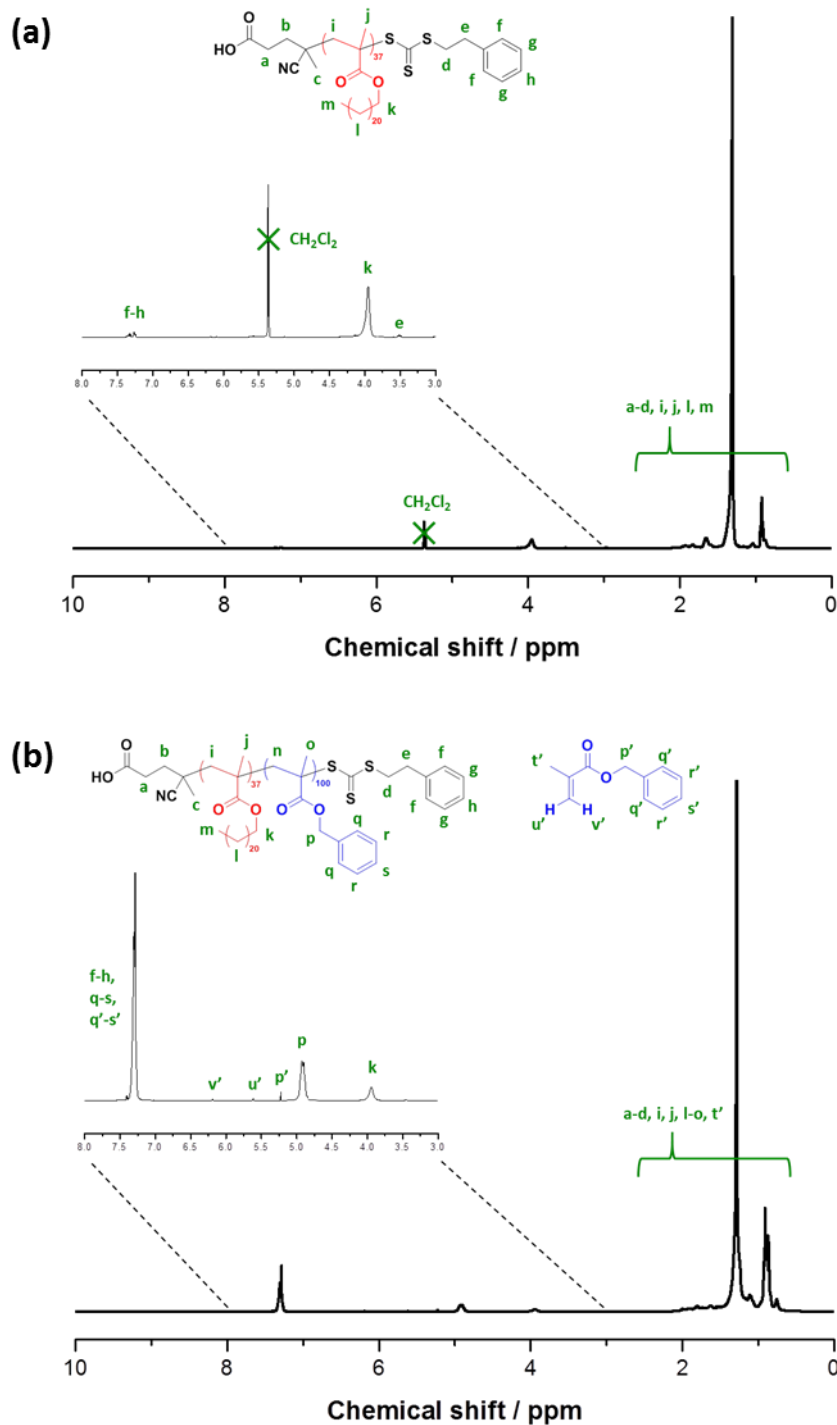

**Figure S1.** Assigned  $^1\text{H}$  NMR spectrum for (a) purified  $\text{PBEMA}_{37}$  macro-CTA in  $\text{CD}_2\text{Cl}_2$  and (b)  $\text{PBEMA}_{37}\text{-PBzMA}_{100}$  in  $\text{CDCl}_3$ .

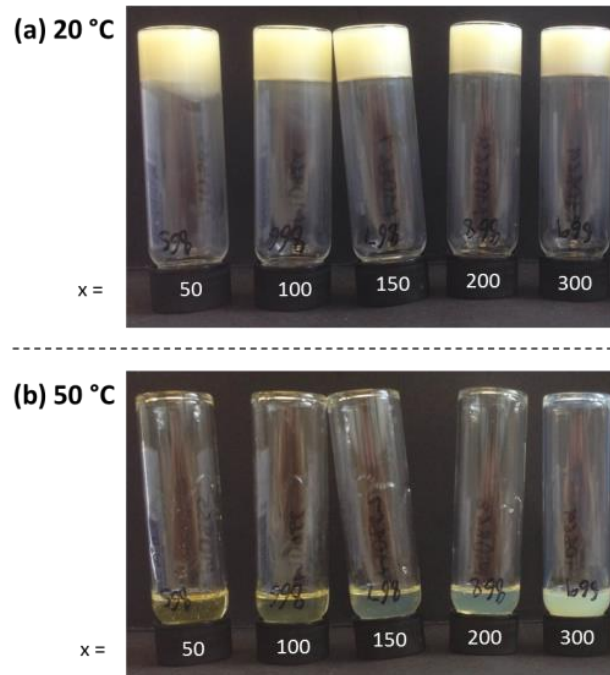

**Figure S2.** Digital images recorded for a series of 20% w/w dispersions of PBeMA<sub>37</sub>-PBzMA<sub>x</sub> spheres prepared in mineral oil at (a) 20 °C and (b) 50 °C.

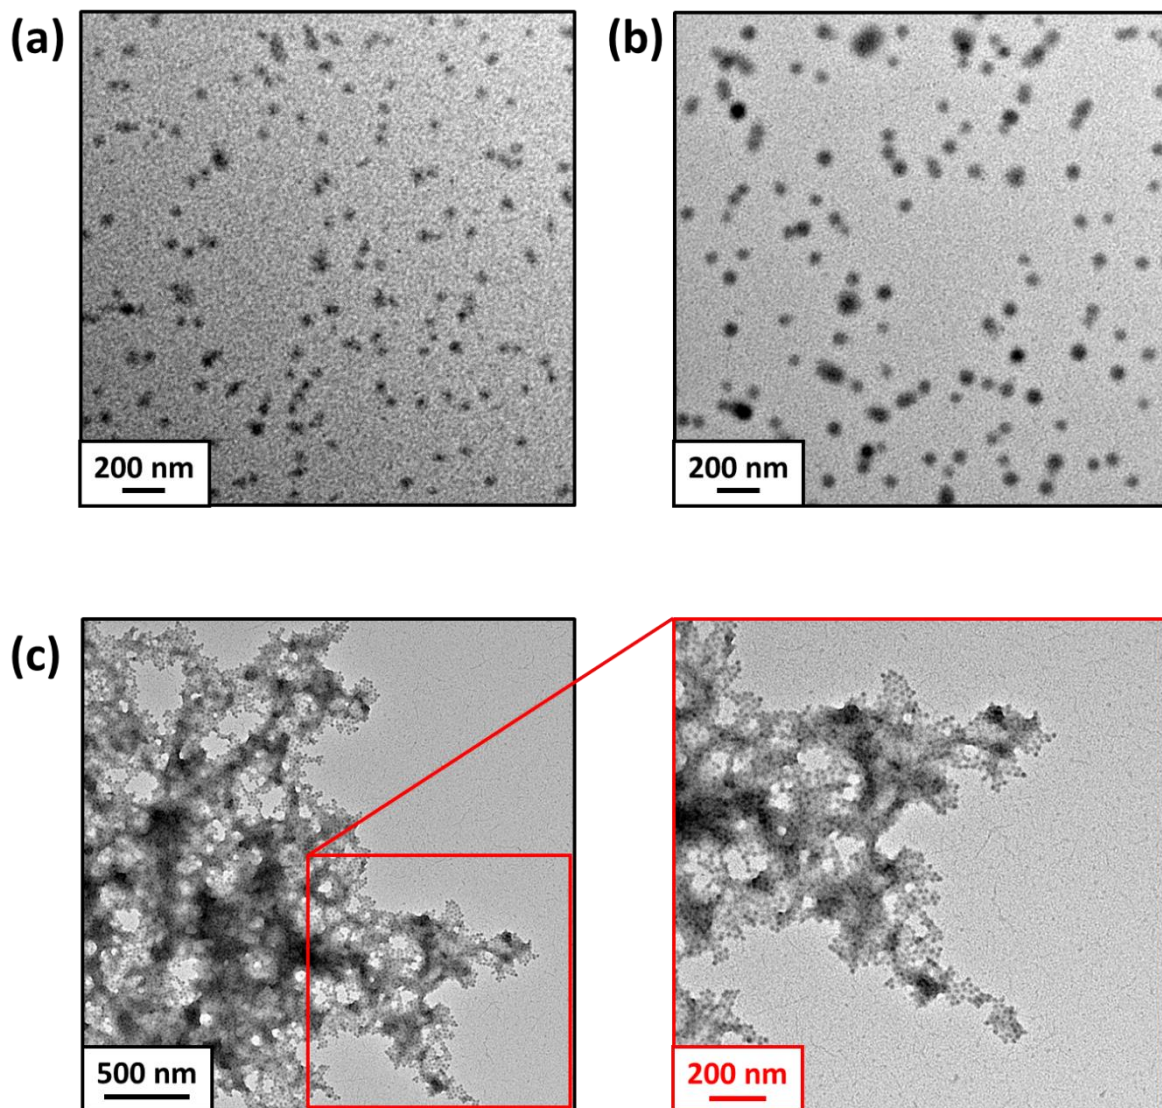

**Figure S3.** Selected transmission electron micrographs obtained for a 0.10% w/w dispersions of (a) PBeMA<sub>37</sub>-PBzMA<sub>100</sub> spheres prepared at 50 °C, (b) PBeMA<sub>37</sub>-PBzMA<sub>300</sub> spheres prepared at 50 °C, and (c) PBeMA<sub>37</sub>-PBzMA<sub>100</sub> spheres prepared at 20 °C. Image analysis on 50 PBeMA<sub>37</sub>-PBzMA<sub>100</sub> nanoparticles prepared at 20 °C indicated a mean core diameter of  $16.2 \pm 1.8$  nm, and a sphere-to-sphere distance of  $23.5 \pm 2.76$  nm.

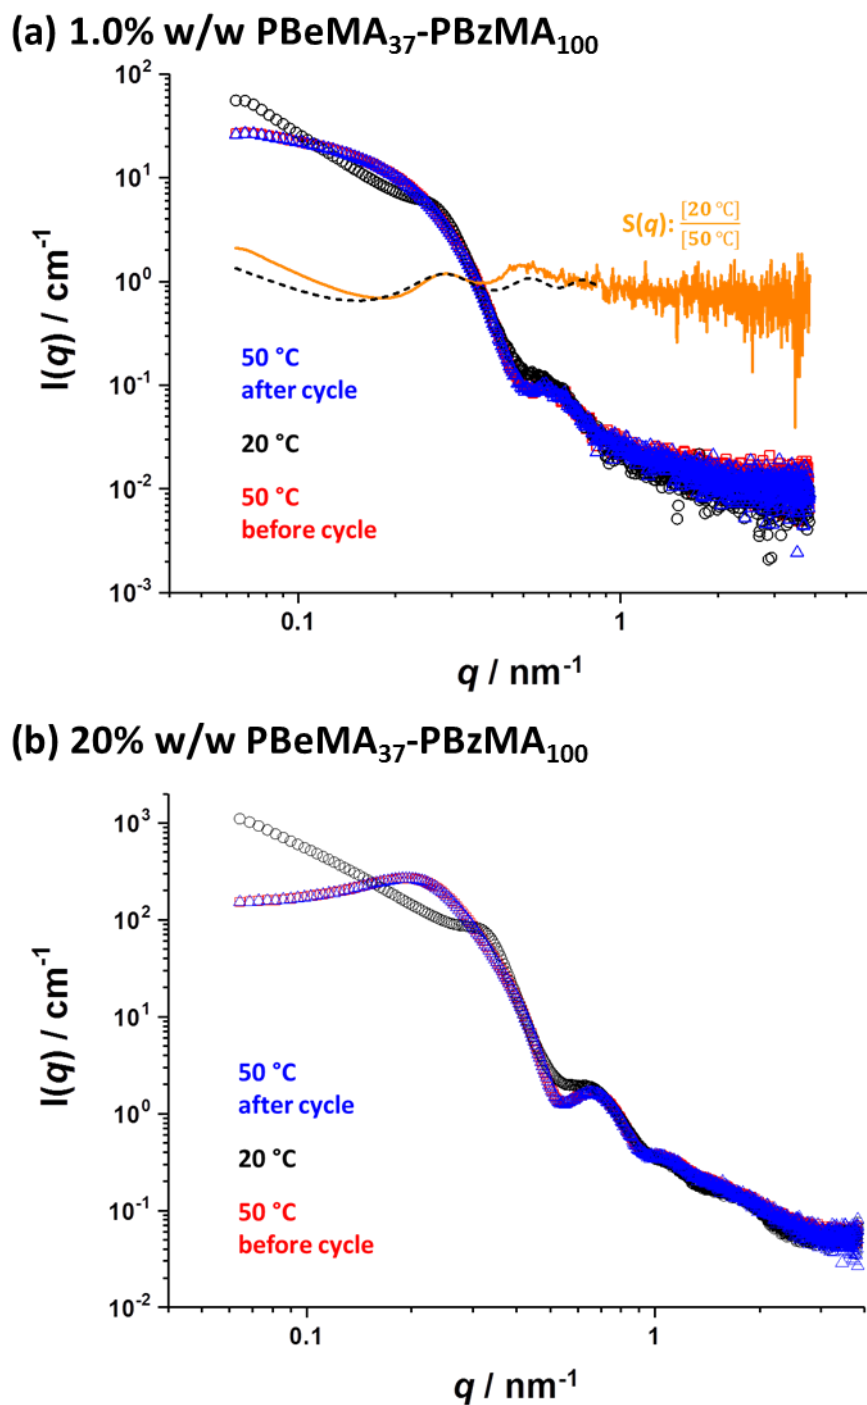

**Figure S4.** Small-angle X-ray scattering (SAXS) patterns recorded for (a) a 1.0% w/w dispersion and (b) a 20% w/w dispersion of PBeMA<sub>37</sub>-PBzMA<sub>100</sub> spheres in mineral oil at 50 °C before cooling (red squares), after cooling to 20 °C (black circles) and after reheating to 50 °C (blue triangles). The structure factor [ $S(q)$ ] observed for a 1.0% w/w dispersion at 20 °C is determined normalizing the pattern obtained at 20 °C relative to that collected at 50 °C for the same dispersion, and is indicated by the orange line in (a), with the fit to the sticky hard-sphere model shown as a black dashed curve.

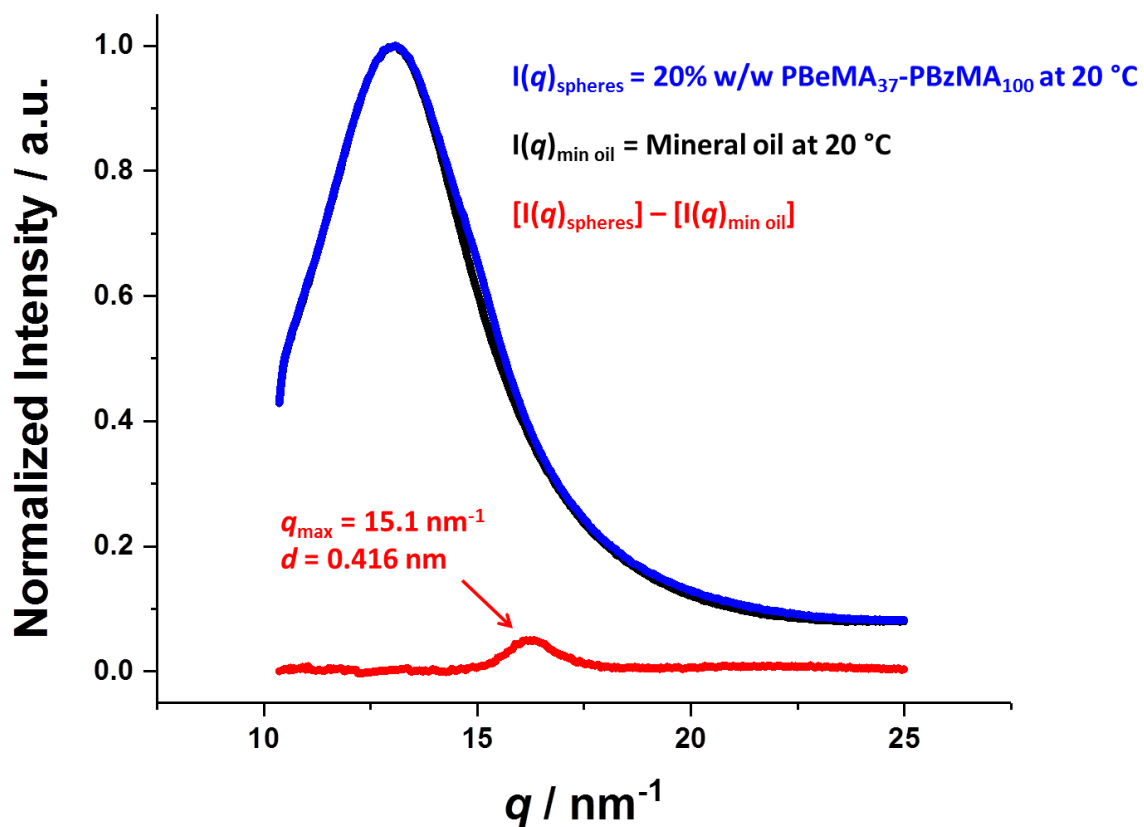

**Figure S5.** Wide-angle X-ray scattering (WAXS) patterns recorded at 20 °C for a 20% w/w dispersion of PBeMA<sub>37</sub>-PBzMA<sub>100</sub> spheres in mineral oil (blue data), mineral oil (black data) and the difference between these patterns (red data). The first two experimental patterns were normalized by their maximum intensities.

### SAXS models

In general, the X-ray intensity scattered by a dispersion of particles [usually represented by the scattering cross section per unit sample volume,  $\frac{d\Sigma}{d\Omega}(q)$ ] can be expressed as:

$$\frac{d\Sigma}{d\Omega}(q) = NS_{SF}(q) \int_0^{\infty} \dots \int_0^{\infty} F(q, r_1, \dots, r_k)^2 \Psi(r_1, \dots, r_k) dr_1 \dots dr_k \quad S1$$

where  $F(q, r_1, \dots, r_k)$  is their form factor,  $r_1, \dots, r_k$  is a set of  $k$  parameters describing the particle structural morphology,  $\Psi(r_1, \dots, r_k)$  is the distribution function,  $S_{SF}(q)$  is the structure factor and  $N$  is the particle number density per unit sample volume expressed as:

$$N = \frac{\varphi}{\int_0^{\infty} \dots \int_0^{\infty} V(r_1, \dots, r_k) \Psi(r_1, \dots, r_k) dr_1 \dots dr_k} \quad S2$$

where  $V(r_1, \dots, r_k)$  is volume of the particle and  $\varphi$  is their volume fraction in the dispersion.

The spherical micelle form factor for Equation *S1* can be expressed as:<sup>1</sup>

$$F_{s\_mic}(q) = N_s^2 \beta_s^2 A_s^2(q, R_s) + N_s \beta_c^2 F_c(q, R_g) + N_s(N_s - 1) \beta_c^2 A_c^2(q) + 2N_s^2 \beta_s \beta_c A_s(q, R_s) A_c(q) \quad S3$$

where  $R_s$  is the radius of the spherical micelle core,  $R_g$  is the radius of gyration of the PBeMA coronal block. The core block and the corona block X-ray scattering length contrast is given by  $\beta_s = V_s(\xi_s - \xi_{sol})$  and  $\beta_c = V_c(\xi_c - \xi_{sol})$ , respectively. Here  $\xi_s$ ,  $\xi_c$  and  $\xi_{sol}$  are the X-ray scattering length densities of the core block ( $\xi_{PBzMA} = 10.38 \times 10^{10} \text{ cm}^{-2}$ ), the corona block ( $\xi_{PBeMA} = 9.26 \times 10^{10} \text{ cm}^{-2}$ ) and the mineral oil solvent ( $\xi_{sol} = 7.63 \times 10^{10} \text{ cm}^{-2}$ ), respectively.

$V_s$  and  $V_c$  are volumes of the core block ( $V_{\text{PBzMA}}$ ) and the corona block ( $V_{\text{PBeMA37}}$ ), respectively. The volumes were obtained from  $V = \frac{M_{n,\text{pol}}}{N_A \rho}$  using the density of PBzMA ( $\rho_{\text{PBzMA}} = 1.15 \text{ g cm}^{-3}$ )<sup>2</sup> and the solid-state homopolymer density of PBeMA determined by helium pycnometry ( $\rho_{\text{PBeMA}} = 0.97 \text{ g cm}^{-3}$ ), where  $M_{n,\text{pol}}$  corresponds to the number-average molecular weight of the block determined by <sup>1</sup>H NMR spectroscopy. The scattering amplitude of the micelle core is expressed via sphere form factor amplitude:

$$A_c(q, R_s) = \Phi(qR_s) \exp\left(-\frac{q^2 \sigma^2}{2}\right) \quad S4$$

where  $\Phi(qR_s) = \frac{3[\sin(qR_s) - qR_s \cos(qR_s)]}{(qR_s)^3}$ . A sigmoidal interface between the two blocks was assumed for the spherical micelle form factor (Equation S4). This is described by the exponent term with a width  $\sigma$  accounting for a decaying scattering length density at the membrane surface. This  $\sigma$  value was fixed at 0.22 nm during fitting.

The scattering amplitude of the spherical micelle corona is:

$$A_c(q) = \frac{\int_{R_s}^{R_s+2s} \mu_c(r) \frac{\sin(qr)}{qr} r^2 dr}{\int_{R_s}^{R_s+2s} \mu_c(r) r^2 dr} \exp\left(-\frac{q^2 \sigma^2}{2}\right) \quad S5$$

The radial profile,  $\mu_c(r)$ , can be expressed by a linear combination of two cubic b splines, with two fitting parameters  $s$  and  $a$  corresponding to the width of the electron density corona profile and the function weight coefficient, respectively. This information can be found elsewhere,<sup>3, 4</sup> as can the approximate integrated form of Equation S5. The self-correlation term for the corona block is given by the Debye function:

$$F_c(q, R_g) = \frac{2[\exp(-q^2 R_g^2) - 1 + q^2 R_g^2]}{q^4 R_g^4} \quad S6$$

where  $R_g$  is the radius of gyration of the PBeMA coronal block. The aggregation number of the spherical micelle is:

$$N_s = (1 - x_{\text{sol}}) \frac{\frac{4}{3} \pi R_s^3}{V_s} \quad S7$$

where  $x_{\text{sol}}$  is the volume fraction of solvent in the PBzMA micelle core. An effective structure factor expression proposed for interacting spherical micelles<sup>5</sup> has been used in Equation *S1*:

$$S_{\text{SF}}(q) = 1 + \frac{A_{\text{s\_mic}}^{\text{av}}(q)^2 [S(q) - 1]}{F_{\text{s\_mic}}(q)} \quad S8$$

Herein the scattering amplitude of the average radial scattering length density distribution of micelles is used as  $A_{\text{s\_mic}}^{\text{av}}(q) = N_s [\beta_s A_s(q, R_s) + \beta_c A_c(q)]$  and  $S_{\text{SF}}(q)$  is either: (1) a hard-sphere interaction structure factor based on the Percus-Yevick approximation,<sup>6</sup>  $S_{\text{PY}}(q, D_{\text{PY}}, f_{\text{PY}})$ , where  $D_{\text{PY}}$  is the interaction distance and  $f_{\text{PY}}$  is the effective hard-sphere volume fraction or (2) a sticky hard-sphere interaction structure factor,<sup>7</sup>  $S_{\text{SHS}}(q, D_{\text{SHS}}, f_{\text{SHS}}, \tau)$ , where  $D_{\text{SHS}}$  is the interaction distance,  $f_{\text{SHS}}$  is the effective hard-sphere volume fraction and  $\tau$  is the so-called ‘stickiness parameter’, which was fixed at 0.10 in all cases. A polydispersity of the micelle core radius ( $R_s$ ) was incorporated in the structural model (Equation *S1*) assuming a Gaussian distribution:

$$\Psi(r_1) = \frac{1}{\sqrt{2\pi\sigma_{R_s}^2}} \exp\left(-\frac{(r_1 - R_s)^2}{2\sigma_{R_s}^2}\right) \quad S9$$



where  $\sigma_{R_s}$  is the standard deviation for  $R_s$ . In accordance with Equation S2 the number density per unit sample volume for the micelle model is expressed as:

$$N = \frac{\varphi}{\int_0^\infty V(r_1)\Psi(r_1)dr_1} \quad S10$$

where  $\varphi$  is the volume fraction of copolymer in a sample and  $V(r_1)$  is the total *volume* of copolymer in a spherical micelle [ $V(r_1) = (V_s + V_c)N_s(r_1)$ ].

The model fitting to the SAXS pattern of 1.0% w/w PBeMA<sub>37</sub>-PBzMA<sub>100</sub> spheres at 50 °C indicated an experimental  $R_g$  for the corona PBeMA block equal to 1.49 nm, which is physically reasonable, since it lies close to a rough theoretical estimate for the parameter. Thus, assuming that the projected contour length of a PBeMA monomer is 0.255 nm (two C-C bonds in *all-trans* conformation), the total contour length of a PBeMA<sub>37</sub> block,  $L_{\text{PBeMA}37} = 37 \times 0.255 \text{ nm} = 9.435 \text{ nm}$ . Given a mean Kuhn length of 1.53 nm (based on the known literature value for PMMA<sup>8</sup>) an estimated unperturbed radius of gyration,  $R_g = (9.435 \times 1.53/6)^{0.5}$ , or 1.55 nm is calculated.

An additional population represented by a power law dependence of scattering intensity ( $Bq^{-p}$ , where  $B$  is a constant and  $p$  is an exponent) was incorporated when fitting the SAXS pattern recorded at 20 °C. This approach enabled the upturn in scattering intensity observed at low  $q$  corresponding to large scattering objects formed by a micelle aggregation (Figures 7 and S2) to be approximated. It is reasonable to assume that the overall structural morphology can be described by mass fractals where  $p$  corresponds to the fractal dimension. Additionally,

a Gaussian peak ( $A \exp \left[ - \left( \frac{q - q_{\text{peak}}}{\text{width}} \right)^2 \right]$ ) was added to the model in order to account for the subtle feature observed at  $q \sim 1.8 \text{ nm}^{-1}$  for the 20% w/w dispersion at 20 °C (Figure 7b, black data). Thus, the entire scattering pattern would be described as:

$$I(q) = \frac{d\Sigma}{d\Omega}(q) + Bq^{-p} + A \exp \left[ - \left( \frac{q - q_{\text{peak}}}{\text{width}} \right)^2 \right] \quad S11$$

where the first term represents scattering from spherical micelles (Equations S1 and S2).

## References

1. J. S. Pedersen, *Journal of Applied Crystallography*, 2000, **33**, 637-640.
2. L. A. Fielding, J. A. Lane, M. J. Derry, O. O. Mykhaylyk and S. P. Armes, *Journal of the American Chemical Society*, 2014, **136**, 5790-5798.
3. J. S. Pedersen and M. C. Gerstenberg, *Colloids and Surfaces a-Physicochemical and Engineering Aspects*, 2003, **213**, 175-187.
4. J. S. Pedersen, C. Svaneborg, K. Almdal, I. W. Hamley and R. N. Young, *Macromolecules*, 2003, **36**, 416-433.
5. J. S. Pedersen, *Journal of Chemical Physics*, 2001, **114**, 2839-2846.
6. D. J. Kinning and E. L. Thomas, *Macromolecules*, 1984, **17**, 1712-1718.
7. S. V. G. Menon, C. Manohar and K. S. Rao, *The Journal of Chemical Physics*, 1991, **95**, 9186-9190.
8. L. J. Fetters, D. J. Lohsey and R. H. Colby, in *Physical Properties of Polymers Handbook*, ed. J. E. Mark, Springer, New York, 2nd edn., 2007, ch. 25, pp. 447-454.
